# Supplementary material
Source: PubMed Central journal article supplement (PMC8096368)
Supplement: djaa164_supplementary_data.pdf [file djaa164_supplementary_data.pdf]

## Supplementary Materials

### Comprehensive Assessment of Diet Quality and Risk of Precursors of Early-Onset Colorectal Cancer

Xiaobin Zheng\*, Jinhee Hur\*, Long H. Nguyen, Jie Liu, Mingyang Song, Kana Wu, Stephanie A. Smith-Warner, Shuji Ogino, Walter C. Willett, Andrew T. Chan<sup>#</sup>, Edward Giovannucci<sup>#</sup>, Yin Cao<sup>#</sup>

\*Contributed equally as the first authors

<sup>#</sup>Contributed equally as the senior authors

## Supplementary Methods

### Assessment of dietary pattern

The procedure for deriving dietary patterns using food consumption data from the semiquantitative food-frequency questionnaire (FFQ) was described in detail elsewhere (1). Briefly, food items on the FFQ were categorized into 40 groups and factor analysis was performed to derive two dominant dietary patterns: Western and prudent diet. Factor loadings were then derived from the correlations between food groups and the two derived factors. Each participant was assigned two factor scores, determined by adding the reported frequencies of food group intakes, weighted by the factor loadings for each factor. These factor scores were then standardized with a mean of 0 and standard deviation of 1. Higher scores indicated stronger adherence to that particular pattern. Western dietary pattern was characterized by high intake of red and processed meats, high-fat dairy, refined grains, and desserts, as opposed to prudent dietary pattern rich in fruits, vegetables, whole grains, legumes, and fish (2).

## Reference

1. Hu FB, Rimm EB, Stampfer MJ, Ascherio A, Spiegelman D, Willett WC. Prospective study of major dietary patterns and risk of coronary heart disease in men. *The American journal of clinical nutrition*. 2000;72(4):912-921.
2. Hu FB. Dietary pattern analysis: a new direction in nutritional epidemiology. *Current opinion in lipidology*. 2002;13(1):3-9.

Supplementary Table 1. Comparison of dietary components and scoring methods for three recommendation-based dietary indexes\*

| Dietary Component           | Dietary Approaches to Stop Hypertension<br>(DASH)† |    |      |    |    | Alternative Mediterranean Diet<br>(AMED)‡ |            | Alternative Healthy Eating Index-2010<br>(AHEI-2010)§ |                    |
|-----------------------------|----------------------------------------------------|----|------|----|----|-------------------------------------------|------------|-------------------------------------------------------|--------------------|
|                             |                                                    |    |      |    |    | Score                                     |            |                                                       |                    |
|                             | 1                                                  | 2  | 3    | 4  | 5  | 0                                         | 1          | 0                                                     | 10                 |
| Fruits                      | Q1                                                 | Q2 | Q3   | Q4 | Q5 | ≤median                                   | >median    | 0 svg/day                                             | ≥4 svg/day         |
| Vegetables                  | Q1                                                 | Q2 | Q3   | Q4 | Q5 | ≤median                                   | >median    | 0 svg/day                                             | ≥5 svg/day         |
| Whole grains                | Q1                                                 | Q2 | Q3   | Q4 | Q5 | ≤median                                   | >median    | 0 g/day                                               | 75 g/day           |
| Nuts and legumes            | Q1                                                 | Q2 | Q3   | Q4 | Q5 | ≤median                                   | >median    | 0 svg/day                                             | ≥1 svg/day         |
| Low-fat dairy               | Q1                                                 | Q2 | Q3   | Q4 | Q5 |                                           | –          |                                                       | –                  |
| Red and processed meats     | Q5                                                 | Q4 | Q3   | Q2 | Q1 | >median                                   | ≤median    | ≥1.5 svg/day                                          | 0 svg/day          |
| Sugar-sweetened beverages   | Q5                                                 | Q4 | Q3   | Q2 | Q1 |                                           | –          | ≥1 svg/day                                            | 0 svg/day          |
| Sodium                      | Q5                                                 | Q4 | Q3   | Q2 | Q1 |                                           | –          | Highest decile                                        | Lowest decile      |
| Fish                        |                                                    |    | –    |    |    | ≤median                                   | >median    |                                                       | –                  |
| MUFA-to-SFA ratio           |                                                    |    | –    |    |    | ≤median                                   | >median    |                                                       | –                  |
| Alcohol                     |                                                    |    | –    |    |    | otherwise                                 | 5-15 g/day | ≥2.5 drinks/day                                       | 0.5-1.5 drinks/day |
| Polyunsaturated fatty acids |                                                    |    | –    |    |    |                                           | –          | ≤2% of energy                                         | ≥10% of energy     |
| Omega-3 fatty acids         |                                                    |    | –    |    |    |                                           | –          | 0 mg/day                                              | 250 mg/day         |
| Trans fatty acids           |                                                    |    | –    |    |    |                                           | –          | ≥4% of energy                                         | ≤0.5% of energy    |
| Total score                 |                                                    |    | 8-40 |    |    |                                           | 0-9        |                                                       | 0-110              |

\*MUFA = monounsaturated fatty acid; Q1-5 = lowest to highest quintile, respectively; SFA = saturated fatty acid; svg = serving.

†DASH consisted of 8 components and the score ranged from 8 to 40. For 5 components (fruits, vegetables, whole grains, nuts and legumes, and low-fat dairy), 1 point was given to the lowest quintile of intake and an additional point was awarded for each increasing quintile. For 3 components (red and processed meats, sugar-sweetened beverages, and sodium), the highest quintile of intake received 1 point and an additional point was awarded for each decreasing quintile.

‡AMED consisted of 9 components and the score ranged from 0 to 9. Nuts and legumes were considered separate components. For 7 components (fruits, vegetables, whole grains, nuts, legumes, fish, and MUFA-to-SFA ratio), intake above the median received 1 point; for red and processed meats, 1 point was given to intake below the median; and for alcohol, moderate intake (5-15 g/day) received 1 point.

§AHEI-2010, consisted of 11 components and the score ranged from 0 to 110. Higher intake was rewarded for 6 components (fruits, vegetables, whole grains, nuts and legumes, polyunsaturated fatty acids, and omega-3 fatty acids), lower intake was rewarded for 4 components (red and processed meats, sugar-sweetened beverages, trans fatty acids, and sodium), and moderate intake (0.5-1.5 drinks/day) was rewarded for alcohol. Each component received a score from 0 (complete nonadherence) to 10 (complete adherence), with partial adherence scores ranging between 0 and 10 directly proportional to intake.

||Sugar-sweetened beverages included fruit juice in the AHEI-2010 diet but not in the DASH diet.

Supplementary Table 2. Diet quality and risk of early-onset (age<50) adenoma among those who only had a colonoscopy, NHSII, 1991-2011\*

| Diet quality                                   | Quintile   |                     |                     |                     |                     |
|------------------------------------------------|------------|---------------------|---------------------|---------------------|---------------------|
|                                                | 1 (lowest) | 2                   | 3                   | 4                   | 5 (highest)         |
| <b>Dietary pattern</b>                         |            |                     |                     |                     |                     |
| <b>Western Dietary Pattern</b>                 |            |                     |                     |                     |                     |
| No. of cases                                   | 148        | 173                 | 176                 | 176                 | 238                 |
| Unadjusted OR (95% CI)                         | 1[Ref]     | 1.12 (0.90 to 1.40) | 1.05 (0.84 to 1.31) | 1.01 (0.81 to 1.26) | 1.26 (1.02 to 1.56) |
| Age-adjusted OR (95% CI)†                      | 1[Ref]     | 1.10 (0.88 to 1.38) | 1.04 (0.83 to 1.30) | 1.00 (0.80 to 1.25) | 1.31 (1.06 to 1.61) |
| Multivariable OR (95% CI)‡                     | 1[Ref]     | 1.09 (0.87 to 1.37) | 1.04 (0.82 to 1.30) | 0.99 (0.79 to 1.26) | 1.28 (1.03 to 1.60) |
| <b>Prudent Dietary Pattern</b>                 |            |                     |                     |                     |                     |
| No. of cases                                   | 241        | 202                 | 173                 | 153                 | 142                 |
| Unadjusted OR (95% CI)                         | 1[Ref]     | 0.98 (0.81 to 1.18) | 0.92 (0.75 to 1.12) | 0.88 (0.72 to 1.09) | 0.88 (0.72 to 1.09) |
| Age-adjusted OR (95% CI)†                      | 1[Ref]     | 0.93 (0.77 to 1.13) | 0.85 (0.70 to 1.04) | 0.82 (0.67 to 1.01) | 0.83 (0.67 to 1.03) |
| Multivariable OR (95% CI)‡                     | 1[Ref]     | 0.93 (0.77 to 1.13) | 0.87 (0.70 to 1.07) | 0.84 (0.67 to 1.04) | 0.85 (0.68 to 1.06) |
| <b>Recommendation-based dietary indexes</b>    |            |                     |                     |                     |                     |
| <b>Dietary Approaches to Stop Hypertension</b> |            |                     |                     |                     |                     |
| No. of cases                                   | 214        | 207                 | 177                 | 150                 | 163                 |
| Unadjusted OR (95% CI)                         | 1[Ref]     | 1.07 (0.88 to 1.30) | 0.92 (0.75 to 1.12) | 0.86 (0.70 to 1.07) | 0.97 (0.79 to 1.20) |
| Age-adjusted OR (95% CI)†                      | 1[Ref]     | 1.03 (0.85 to 1.25) | 0.87 (0.71 to 1.07) | 0.82 (0.66 to 1.02) | 0.92 (0.74 to 1.15) |
| Multivariable OR (95% CI)‡                     | 1[Ref]     | 1.05 (0.86 to 1.27) | 0.90 (0.73 to 1.11) | 0.85 (0.68 to 1.07) | 0.96 (0.76 to 1.21) |
| <b>Alternate Mediterranean Diet</b>            |            |                     |                     |                     |                     |
| No. of cases                                   | 231        | 197                 | 168                 | 167                 | 148                 |
| Unadjusted OR (95% CI)                         | 1[Ref]     | 0.94 (0.77 to 1.14) | 0.82 (0.67 to 1.01) | 0.90 (0.73 to 1.10) | 0.85 (0.69 to 1.05) |
| Age-adjusted OR (95% CI)†                      | 1[Ref]     | 0.91 (0.74 to 1.10) | 0.79 (0.65 to 0.97) | 0.85 (0.69 to 1.05) | 0.80 (0.64 to 1.00) |
| Multivariable OR (95% CI)‡                     | 1[Ref]     | 0.92 (0.76 to 1.13) | 0.81 (0.66 to 1.00) | 0.88 (0.70 to 1.09) | 0.83 (0.65 to 1.05) |
| <b>Alternative Healthy Eating Index-2010</b>   |            |                     |                     |                     |                     |
| No. of cases                                   | 229        | 198                 | 192                 | 144                 | 148                 |
| Unadjusted OR (95% CI)                         | 1[Ref]     | 0.95 (0.78 to 1.15) | 1.04 (0.86 to 1.27) | 0.85 (0.69 to 1.06) | 0.98 (0.80 to 1.21) |
| Age-adjusted OR (95% CI)†                      | 1[Ref]     | 0.92 (0.76 to 1.12) | 1.00 (0.82 to 1.22) | 0.80 (0.65 to 1.00) | 0.92 (0.74 to 1.14) |
| Multivariable OR (95% CI)‡                     | 1[Ref]     | 0.93 (0.76 to 1.13) | 1.01 (0.82 to 1.24) | 0.83 (0.66 to 1.04) | 0.94 (0.75 to 1.18) |

\*CI = confidence interval; NHSII = Nurses' Health Study II; OR = odds ratio.

†Adjusted for age (continuous), total caloric intake (in quintiles), time period of endoscopy (in 2-year intervals), number of reported endoscopies (continuous), time in years since the most recent endoscopy (continuous), and reason for the current endoscopy (screening, symptoms, missing).

‡Additionally adjusted for height (continuous), body mass index (in quintiles), family history of colorectal cancer (yes, no), menopausal status

(premenopausal, postmenopausal), menopausal hormone use (never, past, current use of menopausal hormones), personal history of type 2 diabetes (yes, no), pack-years of smoking (never, 1-4.9, 5-19.9, 20-39.9,  $\geq 40$  pack-years), physical activity (in metabolic equivalent of task-hours/week, quintiles), current use of multivitamin (yes, no), regular use of aspirin (yes, no), and regular use of non-steroidal anti-inflammatory drugs (yes, no). For Dietary Approaches to Stop Hypertension, we additionally adjusted for alcohol intake (0, 0.1-14.9,  $\geq 15$  g/day).

Supplementary Table 3. Diet quality and risk of early-onset (age<50) high-risk adenoma among individuals without or with any symptoms at lower endoscopy, NHSII, 1991-2011\*

| Diet quality                            | Quintile   |                     |                     |                     |                     | <i>P</i> <sub>trend</sub> ‡ |
|-----------------------------------------|------------|---------------------|---------------------|---------------------|---------------------|-----------------------------|
|                                         | 1 (lowest) | 2                   | 3                   | 4                   | 5 (highest)         |                             |
| Without any symptoms at lower endoscopy |            |                     |                     |                     |                     |                             |
| Dietary pattern                         |            |                     |                     |                     |                     |                             |
| Western Dietary Pattern                 |            |                     |                     |                     |                     |                             |
| No. of cases                            | 26         | 40                  | 40                  | 30                  | 40                  |                             |
| Unadjusted OR (95% CI)                  | 1 [Ref]    | 1.55 (0.94 to 2.54) | 1.53 (0.93 to 2.51) | 1.20 (0.71 to 2.04) | 1.59 (0.97 to 2.61) | .23                         |
| Multivariable OR (95% CI)†              | 1 [Ref]    | 1.50 (0.91 to 2.47) | 1.50 (0.91 to 2.47) | 1.22 (0.71 to 2.10) | 1.69 (1.00 to 2.84) | .16                         |
| Prudent Dietary Pattern                 |            |                     |                     |                     |                     |                             |
| No. of cases                            | 42         | 41                  | 36                  | 30                  | 27                  |                             |
| Unadjusted OR (95% CI)                  | 1 [Ref]    | 1.00 (0.65 to 1.54) | 0.90 (0.57 to 1.40) | 0.75 (0.47 to 1.20) | 0.69 (0.42 to 1.12) | .08                         |
| Multivariable OR (95% CI)†              | 1 [Ref]    | 0.89 (0.57 to 1.39) | 0.77 (0.49 to 1.22) | 0.65 (0.40 to 1.07) | 0.62 (0.37 to 1.03) | .04                         |
| Recommendation-based dietary index      |            |                     |                     |                     |                     |                             |
| Dietary Approaches to Stop Hypertension |            |                     |                     |                     |                     |                             |
| No. of cases                            | 38         | 38                  | 42                  | 28                  | 30                  |                             |
| Unadjusted OR (95% CI)                  | 1 [Ref]    | 0.98 (0.62 to 1.54) | 1.01 (0.65 to 1.57) | 0.73 (0.45 to 1.20) | 0.76 (0.47 to 1.23) | .16                         |
| Multivariable OR (95% CI)†              | 1 [Ref]    | 0.91 (0.58 to 1.43) | 0.91 (0.57 to 1.44) | 0.65 (0.39 to 1.08) | 0.67 (0.39 to 1.14) | .07                         |
| Alternative Mediterranean Diet          |            |                     |                     |                     |                     |                             |
| No. of cases                            | 51         | 28                  | 38                  | 34                  | 25                  |                             |
| Unadjusted OR (95% CI)                  | 1 [Ref]    | 0.57 (0.36 to 0.90) | 0.75 (0.49 to 1.15) | 0.74 (0.48 to 1.15) | 0.50 (0.31 to 0.81) | .04                         |
| Multivariable OR (95% CI)†              | 1 [Ref]    | 0.53 (0.33 to 0.85) | 0.67 (0.44 to 1.04) | 0.63 (0.39 to 1.03) | 0.42 (0.24 to 0.73) | .01                         |
| Alternative Healthy Eating Index-2010   |            |                     |                     |                     |                     |                             |
| No. of cases                            | 44         | 47                  | 29                  | 26                  | 30                  |                             |
| Unadjusted OR (95% CI)                  | 1 [Ref]    | 1.06 (0.70 to 1.60) | 0.68 (0.42 to 1.08) | 0.61 (0.38 to 0.99) | 0.72 (0.45 to 1.15) | .04                         |
| Multivariable OR (95% CI)†              | 1 [Ref]    | 0.96 (0.63 to 1.47) | 0.60 (0.37 to 0.96) | 0.54 (0.32 to 0.90) | 0.62 (0.38 to 1.02) | .01                         |
| With any symptoms at lower endoscopy    |            |                     |                     |                     |                     |                             |
| Dietary pattern                         |            |                     |                     |                     |                     |                             |
| Western Dietary Pattern                 |            |                     |                     |                     |                     |                             |
| No. of cases                            | 24         | 31                  | 35                  | 39                  | 58                  |                             |
| Unadjusted OR (95% CI)                  | 1 [Ref]    | 1.23 (0.72 to 2.10) | 1.23 (0.73 to 2.08) | 1.27 (0.76 to 2.12) | 1.72 (1.06 to 2.77) | .03                         |
| Multivariable OR (95% CI)†              | 1 [Ref]    | 1.20 (0.70 to 2.05) | 1.23 (0.72 to 2.10) | 1.22 (0.73 to 2.05) | 1.58 (0.96 to 2.59) | .08                         |
| Prudent Dietary Pattern                 |            |                     |                     |                     |                     |                             |

|                                         |         |                     |                     |                     |                     |      |
|-----------------------------------------|---------|---------------------|---------------------|---------------------|---------------------|------|
| No. of cases                            | 57      | 39                  | 35                  | 28                  | 28                  |      |
| Unadjusted OR (95% CI)                  | 1 [Ref] | 0.83 (0.55 to 1.25) | 0.83 (0.55 to 1.27) | 0.73 (0.46 to 1.15) | 0.80 (0.51 to 1.26) | .30  |
| Multivariable OR (95% CI)†              | 1 [Ref] | 0.85 (0.56 to 1.29) | 0.87 (0.56 to 1.36) | 0.76 (0.48 to 1.23) | 0.82 (0.50 to 1.34) | .41  |
| Recommendation-based dietary index      |         |                     |                     |                     |                     |      |
| Dietary Approaches to Stop Hypertension |         |                     |                     |                     |                     |      |
| No. of cases                            | 56      | 37                  | 40                  | 29                  | 25                  |      |
| Unadjusted OR (95% CI)                  | 1 [Ref] | 0.75 (0.49 to 1.14) | 0.86 (0.57 to 1.29) | 0.69 (0.44 to 1.08) | 0.64 (0.40 to 1.03) | .06  |
| Multivariable OR (95% CI)†              | 1 [Ref] | 0.73 (0.47 to 1.13) | 0.83 (0.53 to 1.28) | 0.66 (0.41 to 1.07) | 0.59 (0.35 to 0.99) | .045 |
| Alternative Mediterranean Diet          |         |                     |                     |                     |                     |      |
| No. of cases                            | 48      | 41                  | 36                  | 37                  | 25                  |      |
| Unadjusted OR (95% CI)                  | 1 [Ref] | 0.99 (0.65 to 1.50) | 0.88 (0.57 to 1.36) | 1.03 (0.67 to 1.59) | 0.74 (0.45 to 1.20) | .34  |
| Multivariable OR (95% CI)†              | 1 [Ref] | 0.98 (0.63 to 1.50) | 0.85 (0.54 to 1.35) | 0.97 (0.60 to 1.55) | 0.66 (0.39 to 1.11) | .20  |
| Alternative Healthy Eating Index-2010   |         |                     |                     |                     |                     |      |
| No. of cases                            | 56      | 37                  | 41                  | 27                  | 26                  |      |
| Unadjusted OR (95% CI)                  | 1 [Ref] | 0.76 (0.50 to 1.16) | 0.96 (0.64 to 1.44) | 0.70 (0.44 to 1.11) | 0.77 (0.48 to 1.23) | .20  |
| Multivariable OR (95% CI)†              | 1 [Ref] | 0.78 (0.51 to 1.19) | 0.99 (0.65 to 1.51) | 0.73 (0.45 to 1.20) | 0.80 (0.48 to 1.32) | .32  |

\*High-risk adenoma includes adenoma  $\geq 1$  cm, or with tubulovillous/villous histology or high-grade dysplasia, or  $\geq 3$  adenomas. Symptoms include visible blood in stool specimen, positive fecal occult blood test result, abdominal pain, diarrhea or constipation. CI = confidence interval; NHSII = Nurses' Health Study II; OR = odds ratio.

†Adjusted for age (continuous), total caloric intake (in quintiles), time period of endoscopy (in 2-year intervals), number of reported endoscopies (continuous), time in years since the most recent endoscopy (continuous), height (continuous), body mass index (in quintiles), family history of colorectal cancer (yes, no), menopausal status (premenopausal, postmenopausal), menopausal hormone use (never, past, current use of menopausal hormones), personal history of type 2 diabetes (yes, no), pack-years of smoking (never, 1-4.9, 5-19.9, 20-39.9,  $\geq 40$  pack-years), physical activity (in metabolic equivalent of task-hours/week, quintiles), current use of multivitamin (yes, no), regular use of aspirin (yes, no), and regular use of non-steroidal anti-inflammatory drugs (yes, no). For Dietary Approaches to Stop Hypertension, we additionally adjusted for alcohol intake (0, 0.1-14.9,  $\geq 15$  g/day).

‡Calculated using the median of each quintile as a continuous variable.

Supplementary Table 4. Joint association of Western and prudent dietary patterns with risk of early-onset (age<50) high-risk adenoma, NHSII, 1991-2011\*

|                            | Western Dietary Pattern (Q5)<br>& Prudent Dietary Pattern (Q1) | Western Dietary Pattern (Q1)<br>& Prudent Dietary Pattern (Q1) | Western Dietary Pattern (Q5)<br>& Prudent Dietary Pattern (Q5) | Western Dietary Pattern (Q1)<br>& Prudent Dietary Pattern (Q5) |
|----------------------------|----------------------------------------------------------------|----------------------------------------------------------------|----------------------------------------------------------------|----------------------------------------------------------------|
| No. of cases               | 62                                                             | 1                                                              | 3                                                              | 29                                                             |
| Unadjusted OR (95% CI)     | 1 [Ref]                                                        | 0.65 (0.09 to 4.74)                                            | 1.29 (0.40 to 4.15)                                            | 0.59 (0.38 to 0.93)                                            |
| Multivariable OR (95% CI)† | 1 [Ref]                                                        | 0.82 (0.11 to 6.18)                                            | 1.19 (0.37 to 3.80)                                            | 0.58 (0.36 to 0.92)                                            |

\*High-risk adenoma includes adenoma  $\geq 1$  cm, or with tubulovillous/villous histology or high-grade dysplasia, or  $\geq 3$  adenomas. CI = confidence interval; NHSII = Nurses' Health Study II; OR = odds ratio; Q1 = lowest quintile; Q5 = highest quintile.

†Adjusted for age (continuous), total caloric intake (in quintiles), time period of endoscopy (in 2-year intervals), number of reported endoscopies (continuous), time in years since the most recent endoscopy (continuous), reason for the current endoscopy (screening, symptoms, missing), height (continuous), body mass index (in quintiles), family history of colorectal cancer (yes, no), menopausal status (premenopausal, postmenopausal), menopausal hormone use (never, past, current use of menopausal hormones), personal history of type 2 diabetes (yes, no), pack-years of smoking (never, 1-4.9, 5-19.9, 20-39.9,  $\geq 40$  pack-years), physical activity (in metabolic equivalent of task-hours/week, quintiles), current use of multivitamin (yes, no), regular use of aspirin (yes, no), and regular use of non-steroidal anti-inflammatory drugs (yes, no).

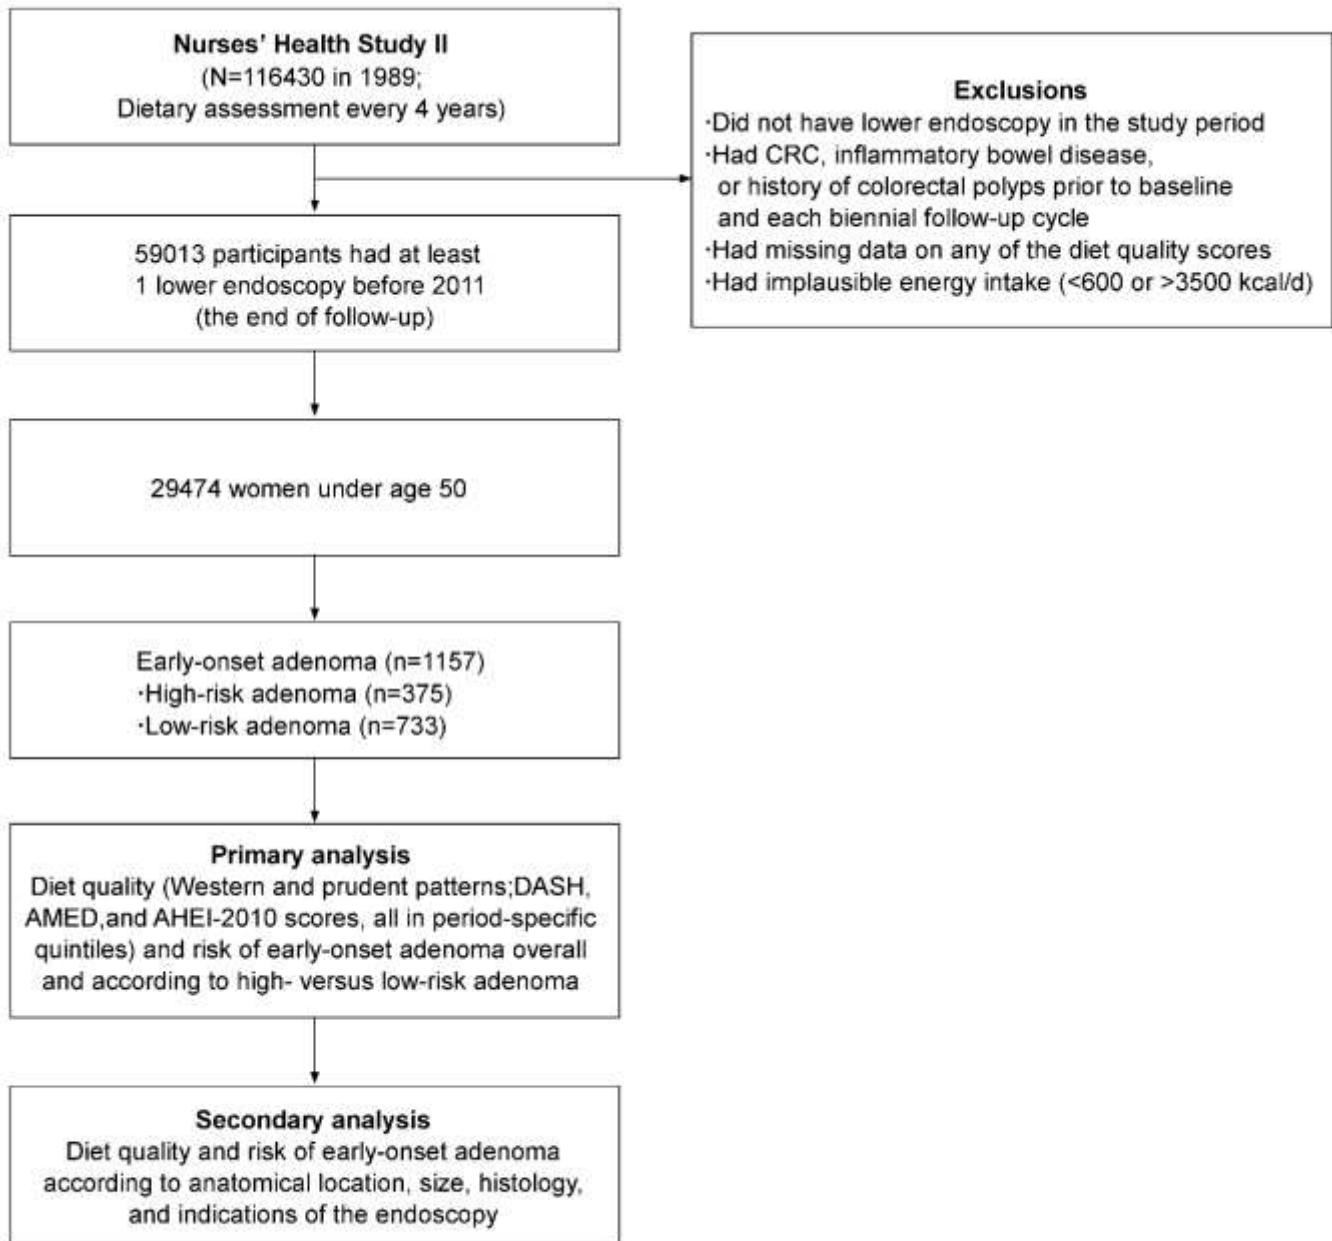

**Supplementary Figure 1. Flow diagram of the study population.**

AHEI, Alternative Healthy Eating Index; AMED, Alternative Mediterranean Diet; CRC, colorectal cancer; DASH, Dietary Approaches to Stop Hypertension.
